# Supplementary material for: Improvement of sleep in patients with chronic idiopathic/spontaneous urticaria treated with omalizumab: results of three randomized, double-blind, placebo-controlled studies
Source: PubMed Central journal article supplement (PMC4989527; doi:10.1186/s13601-016-0120-0), 2016-08-18

**a**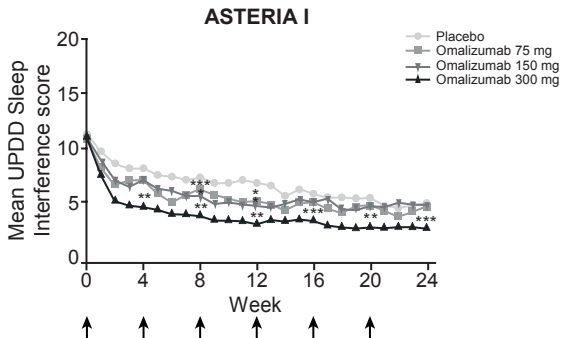**b**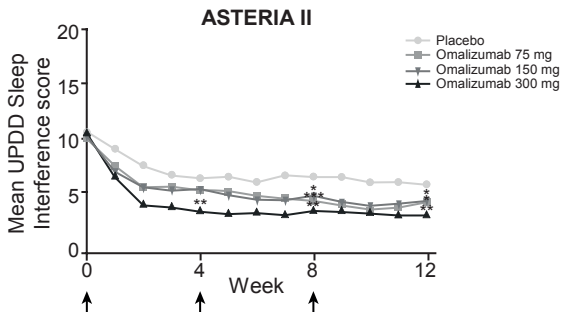**c**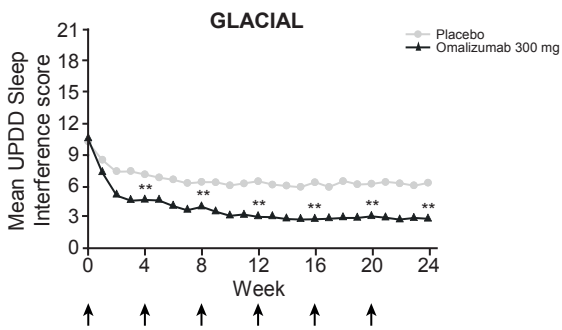

Supplement: 13601_2016_120_MOESM1_ESM.pdf [file 13601_2016_120_MOESM1_ESM.pdf]
